# Supplementary material for: New Scabimycins A-C Isolated from Streptomyces acidiscabies (Lu19992)
Source: MDPI journal article supplement (doi:10.3390/molecules26195922), 2021-09-29
Supplement: s1 [file s1]

Supporting Information

Table S1. NMR spectroscopic data of scabimycins A-C (1-3) in DMSO-d<sub>6</sub>

| Scabimycin A (1) |                             |                             |         |            |            |            |             | Scabimycin B (2) |                             |                             |         |            |            |            | Scabimycin C (3) |                             |                             |          |            |
|------------------|-----------------------------|-----------------------------|---------|------------|------------|------------|-------------|------------------|-----------------------------|-----------------------------|---------|------------|------------|------------|------------------|-----------------------------|-----------------------------|----------|------------|
| position         | δ <sub>C</sub> <sup>a</sup> | δ <sub>H</sub> <sup>b</sup> | Cosy    | HMBC       | N-<br>HMBC | N-<br>HSQC | NOESY       | position         | δ <sub>C</sub> <sup>a</sup> | δ <sub>H</sub> <sup>b</sup> | Cosy    | HMBC       | N-<br>HMBC | N-<br>HSQC | position         | δ <sub>C</sub> <sup>a</sup> | δ <sub>H</sub> <sup>b</sup> | Cosy     | HMBC       |
| 1                | 20.6, CH <sub>3</sub>       | 1.19, d (6.8)               | 2       | 2, 3       | -          | -          | -           | 1                | 22.0, CH <sub>3</sub>       | 1.88, s                     | -       | 2          | 2-NH       | -          | 1                | 22.0, CH <sub>3</sub>       | 1.86, s                     | -        | 2          |
| 2                | 66.9, CH                    | 3.98, q (6.8)               | 1       | 1, 3       | -          | -          | -           | 2                | 170.8, C                    | -                           | -       | -          | -          | -          | 2                | 170.4, C                    | -                           | -        | -          |
| 3                | 174.5, C                    | -                           | -       | -          | -          | -          | -           |                  |                             |                             |         |            |            |            |                  |                             |                             |          |            |
| allo-Ile         |                             |                             |         |            |            |            |             | allo-Ile         |                             |                             |         |            |            |            | allo-Ile         |                             |                             |          |            |
| 3-NH             | -                           | 7.66, d (7.6)               | 4       | 3, 4, 9    | -          | 111.3      | 9-NH        | 2-NH             | -                           | 8.42, s (br)                | 3       | -          | -          | 125.0      | 2-NH             | -                           | 8.23, d (6.8)               | 3        | 2, 3, 4    |
| 4                | 55.9, CH                    | 4.33, t (7.6)               | 5, 3-NH | 5, 6, 7    | 3-NH       | -          | 9-NH        | 3                | 58.2, CH                    | 4.06, m                     | 2-NH, 4 | 4, 5, 6, 8 | 2-NH       | -          | 3                | 58.4, CH                    | 4.06, t (6.8)               | 2-NH     | 4, 5, 6, 8 |
| 5                | 36.8, CH                    | 1.83, m                     | 4, 6    | 4, 6, 7, 8 | -          | -          | -           | 4                | 34.8, CH                    | 1.77, m                     | 3, 5    | -          | -          | -          | 4                | 35.5, CH                    | 1.73, m                     | 3, 5     | -          |
| 6                | 15.2, CH <sub>3</sub>       | 0.89, t (6.6)               | 5       | 4, 5, 7    |            |            | -           | 5                | 15.1, CH <sub>3</sub>       | 0.92, d (6.9)               | 4       | 3, 4, 6    | -          | -          | 5                | 15.4, CH <sub>3</sub>       | 0.91, d (6.6)               | 4        | 3, 4, 6    |
| 7                | 23.9, CH <sub>2</sub>       | 1.46, m                     | 8       | 4, 5, 6, 8 | -          | -          | -           | 6                | 24.5, CH <sub>2</sub>       | 1.55, m                     | 7       | 3, 4, 7    | -          | -          | 6                | 25.1, CH <sub>2</sub>       | 1.52, m                     | 7        | 4, 5, 7    |
| 8                | 10.9, CH <sub>3</sub>       | 0.84, t (7.4)               | 7       | 5, 7       | -          | -          | -           | 7                | 10.7, CH <sub>3</sub>       | 0.86, t*                    | 6       | 4, 6       | -          | -          | 7                | 11.1, CH <sub>3</sub>       | 0.85, t (7.4)               | 6        | 4, 6       |
| 9                | 170.9, C                    | -                           | -       | -          | -          | -          | -           | 8                | 171.3, C                    | -                           | -       | -          | -          | -          | 8                | 171.7, C                    | -                           | -        | -          |
| Dhb              |                             |                             |         |            |            |            |             | Dhb              |                             |                             |         |            |            |            | Dhb              |                             |                             |          |            |
| 9-NH             | -                           | 9.75, s                     | -       | 9, 13      | -          | 124.8      | 3-NH, 4, 12 | 8-NH             | -                           | 9.63, s                     | 11      | 8, 12      | -          | 123.6      | 8-NH             | -                           | 9.61, s                     | 11       | 8, 10, 12  |
| 10               | 130.7, C                    | -                           | -       | -          | -          | -          | -           | 9                | 129.8, C                    | -                           | -       | -          | -          | -          | 9                | 130.7, C                    | -                           | -        | -          |
| 11               | 124.8, CH                   | 6.17, q (6.9)               | 12      | 10, 12, 13 | 9-NH       | -          | 13-NH       | 10               | 128.3, CH                   | 6.43, q (7.0)               | 11      | 9, 11, 12  | 8-NH       | -          | 10               | 127.6, CH                   | 6.36, q (7.2)               | 11       | 11, 12     |
| 12               | 12.4, CH <sub>3</sub>       | 1.70, d (6.9)               | 11      | 10, 11     | -          | -          | 9-NH        | 11               | 12.6, CH <sub>3</sub>       | 1.69, d (7.0)               | 10      | 9          | -          | -          | 11               | 13.1, CH <sub>3</sub>       | 1.69, d (6.9)               | 8-NH, 10 | 9, 10      |
| 13               | 163.5, C                    | -                           | -       | -          | -          | -          | -           | 12               | 163.7, C                    | -                           | -       | -          | -          | -          | 12               | 163.2, C                    | -                           | -        | -          |

| Dhb   |                       |               |           |            |       |       |                   | Dhb   |                       |               |            |                |       |       |       | Dhb                   |               |           |        |
|-------|-----------------------|---------------|-----------|------------|-------|-------|-------------------|-------|-----------------------|---------------|------------|----------------|-------|-------|-------|-----------------------|---------------|-----------|--------|
| 13-NH | -                     | 9.06, s       | -         | 13, 15     | -     | 115.7 | 11, 16, 17-NH     | 12-NH | -                     | 9.00, s       | 15         | 12, 16         | -     | 116.5 | 12-NH | -                     | 8.78, s       | 15        | 14, 16 |
| 14    | 129.9, C              | -             | -         | -          | -     | -     | -                 | 13    | 130.3, C              | -             | -          | -              | -     | -     | 13    | 129.2, C              | -             | -         | -      |
| 15    | 129.1, CH             | 6.47, q (6.9) | 16        | 16, 17     | 13-NH | -     | 17-NH             | 14    | 127.5, CH             | 6.32, q (7.0) | 15         | 13, 16         | 12-NH | -     | 14    | 130.1, CH             | 6.49, m       | 15        | 15, 16 |
| 16    | 12.4, CH <sub>3</sub> | 1.64, d (6.9) | 15        | 14, 15     | -     | -     | -                 | 15    | 12.6, CH <sub>3</sub> | 1.68, d (7.0) | 14         | 13, 14         | -     | -     | 15    | 13.8, CH <sub>3</sub> | 1.63, d (6.7) | 12-NH, 14 | 13, 14 |
| 17    | 163.6, C              | -             | -         | -          | -     | -     | -                 | 16    | 162.6, C              | -             | -          | -              | -     | -     | 16    | 162.4, C              | -             | -         | -      |
| Ala   |                       |               |           |            |       |       |                   | Dhb   |                       |               |            |                |       |       |       | Dhb                   |               |           |        |
| 17-NH | -                     | 7.63, d (7.0) | 18        | 17, 18, 19 | -     | 116.4 | 13-NH, 19, 20-NH  | 16-NH | -                     | 8.67, s       | 19         | 16, 18         | -     | 112.4 | 16-NH | -                     | 8.44, s       | 19        | 20     |
| 18    | 48.1, CH              | 4.36, t (7.0) | 17-NH, 19 | 17, 19     | 17-NH | -     | 20-NH             | 17    | 129.8, C              | -             | -          | -              | -     | -     | 17    | 129.2, C              | -             | -         | -      |
| 19    | 17.0, CH <sub>3</sub> | 1.30, (7.0)   | 18        | 18, 20     | 17-NH | -     | -                 | 18    | 129.4, CH             | 6.49, q (7.0) | 19         | 17, 19, 20     | 16-NH | -     | 18    | 130.1, CH             | 6.48, m       | 19        | 19, 20 |
| 20    | 170.9, C              | -             | -         | -          | -     | -     | -                 | 19    | 12.6, CH <sub>3</sub> | 1.61, d (7.0) | 18         | 18, 20         | -     | -     | 19    | 13.8, CH <sub>3</sub> | 1.63, d (6.7) | 16-NH, 18 | 17, 18 |
|       |                       |               |           |            |       |       |                   | 20    | 163.0, C              | -             | -          | -              | -     | -     | 20    | 162.4, C              | -             | -         | -      |
| Dhb   |                       |               |           |            |       |       |                   | Leu   |                       |               |            |                |       |       |       |                       |               |           |        |
| 20-NH | -                     | 9.20, s       | 23        | 20, 24     | -     | 121.7 | 17-NH, 18, 19, 23 | 20-NH | -                     | 7.42, d (7.8) | 21         | 20, 21         | -     | 115.1 |       |                       |               |           |        |
| 21    | 131.4, C              | -             | -         | -          | -     | -     | -                 | 21    | 50.5, CH              | 4.18, m       | 20-NH, 22  | 20, 22, 23, 26 | -     | -     |       |                       |               |           |        |
| 22    | 120.2, CH             | 5.52, q (6.9) | 23        | 21, 23, 24 | 20-NH | -     | 25                | 22    | 39.8, CH <sub>2</sub> | 1.60, m       | 21, 23     | 21, 23, 26     | 20-NH | -     |       |                       |               |           |        |
| 23    | 11.8, CH <sub>3</sub> | 1.64, (6.9)   | 22        | 21, 22     | -     | -     | -                 | 23    | 23.7, CH              | 1.62, m       | 22, 24, 25 | 22, 26         | -     | -     |       |                       |               |           |        |
| 24    | 165.3, C              | -             | -         | -          | -     | -     | -                 | 24/25 | 20.9, CH <sub>3</sub> | 0.81, d (6.5) | 23         | 22, 23         | -     | -     |       |                       |               |           |        |
|       |                       |               |           |            |       |       |                   |       | 22.6, CH <sub>3</sub> | 0.84, d (6.5) |            |                |       |       |       |                       |               |           |        |
| Pro   |                       |               |           |            |       |       |                   |       |                       |               |            |                |       |       |       |                       |               |           |        |
|       |                       |               |           |            |       |       |                   |       |                       |               |            |                |       |       |       |                       |               |           |        |

|    |                          |                    |        |               |   |   |   |
|----|--------------------------|--------------------|--------|---------------|---|---|---|
| 25 | 48.5,<br>CH <sub>2</sub> | 3.60, m<br>3.40, m | 25     | 26, 27,<br>28 | - | - | - |
| 26 | 24.8,<br>CH <sub>2</sub> | 1.84, m<br>1.72 m  | 25, 27 | 28            | - | - | - |
| 27 | 28.8,<br>CH <sub>2</sub> | 2.14, m<br>1.77, m | 26, 28 | 25, 26        | - | - | - |
| 28 | 58.5,<br>CH              | 4.18, t<br>(7.4)   | 27     | 26, 27,<br>29 | - | - | - |
| 29 | 173.2,<br>C              | -                  | -      | -             | - | - | - |

<sup>a</sup>followed by multiplicity, <sup>13</sup>C chemical shifts were all taken from HSQC and HMBC spectra

<sup>b</sup>followed by multiplicity and coupling constant *J* in Hz

#### MS spectra of scabimycins A-C

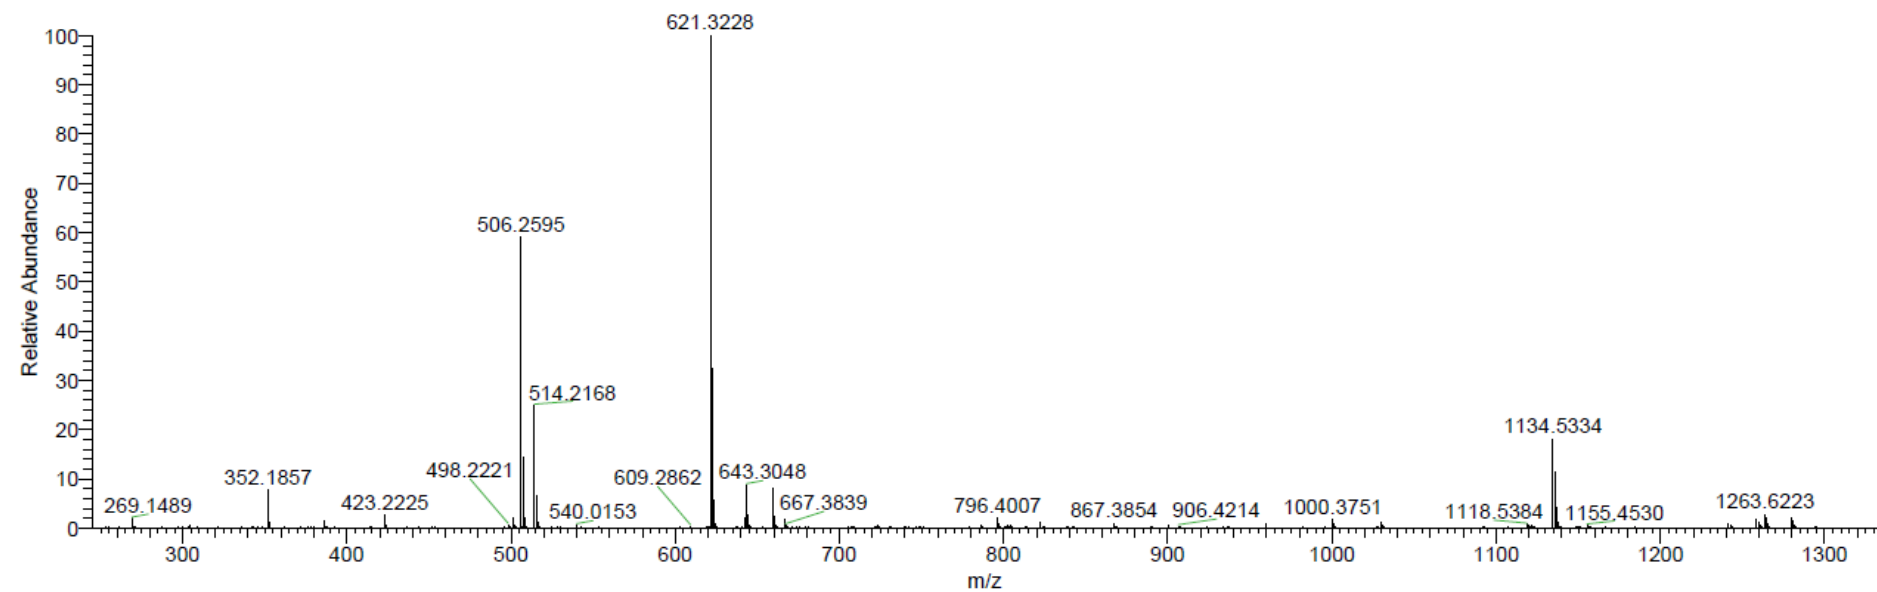

**Figure S1.** MS spectra of scabimycin A, showing the exact mass m/z 621.3228 [M+H]<sup>+</sup>.

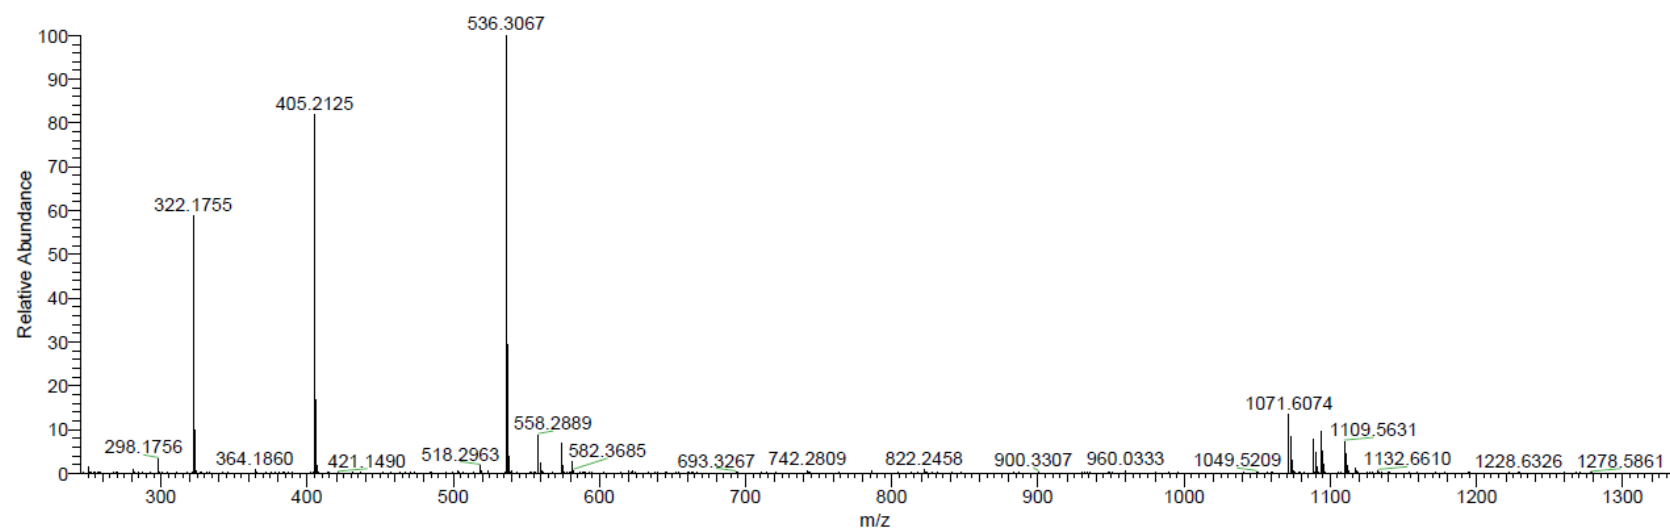

**Figure S2.** MS spectra of scabimycin B, showing the exact mass  $m/z$  536.3067  $[M+H]^+$ .

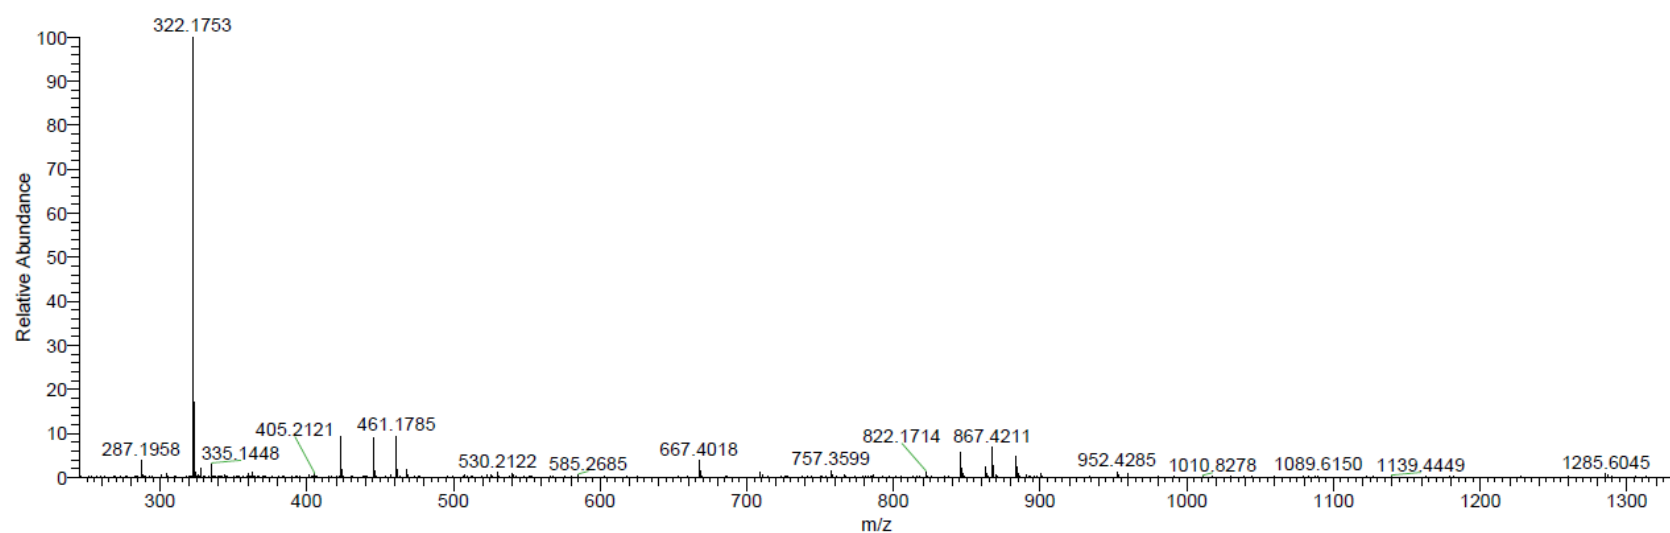

**Figure S3.** MS spectra of scabimycin C, showing the exact mass without dehydrobutyrine (as explained in the main text, this mass predominates)  $m/z$  322.1753  $[M+H]^+$ .

*1D/2D NMR spectra of Scabimycins A-C*

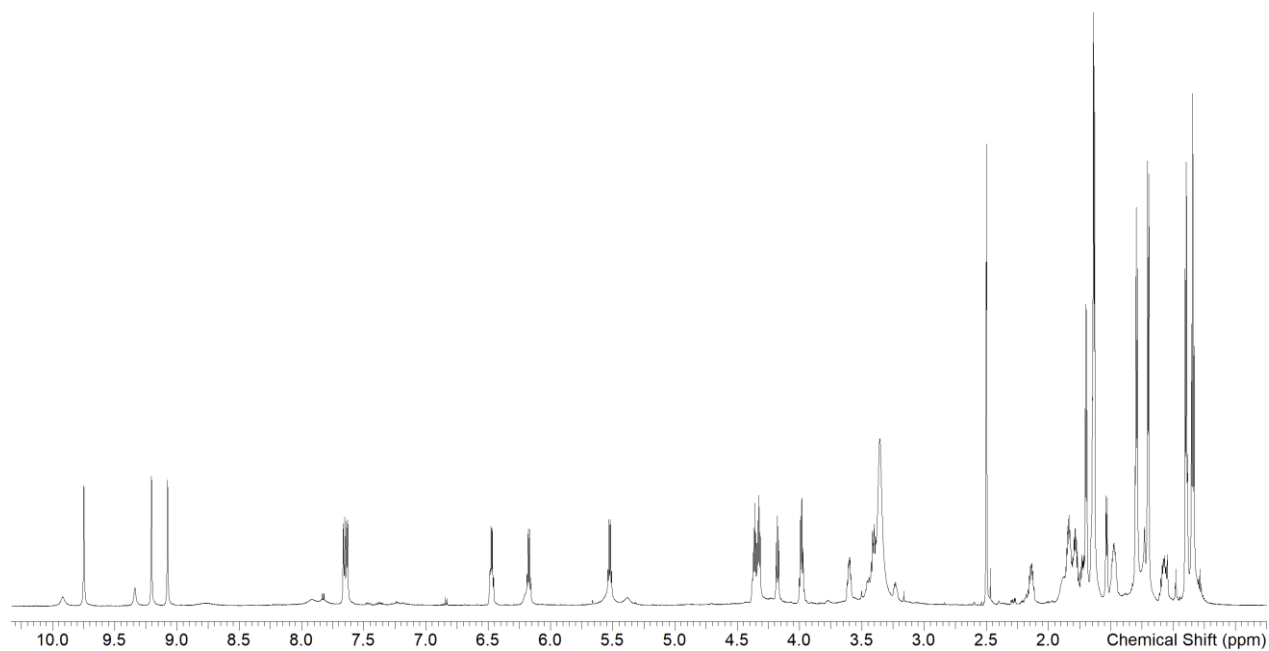

**Figure S4.**  $^1\text{H}$  NMR spectrum of scabimycin A (DMSO- $d_6$ , 700 MHz).

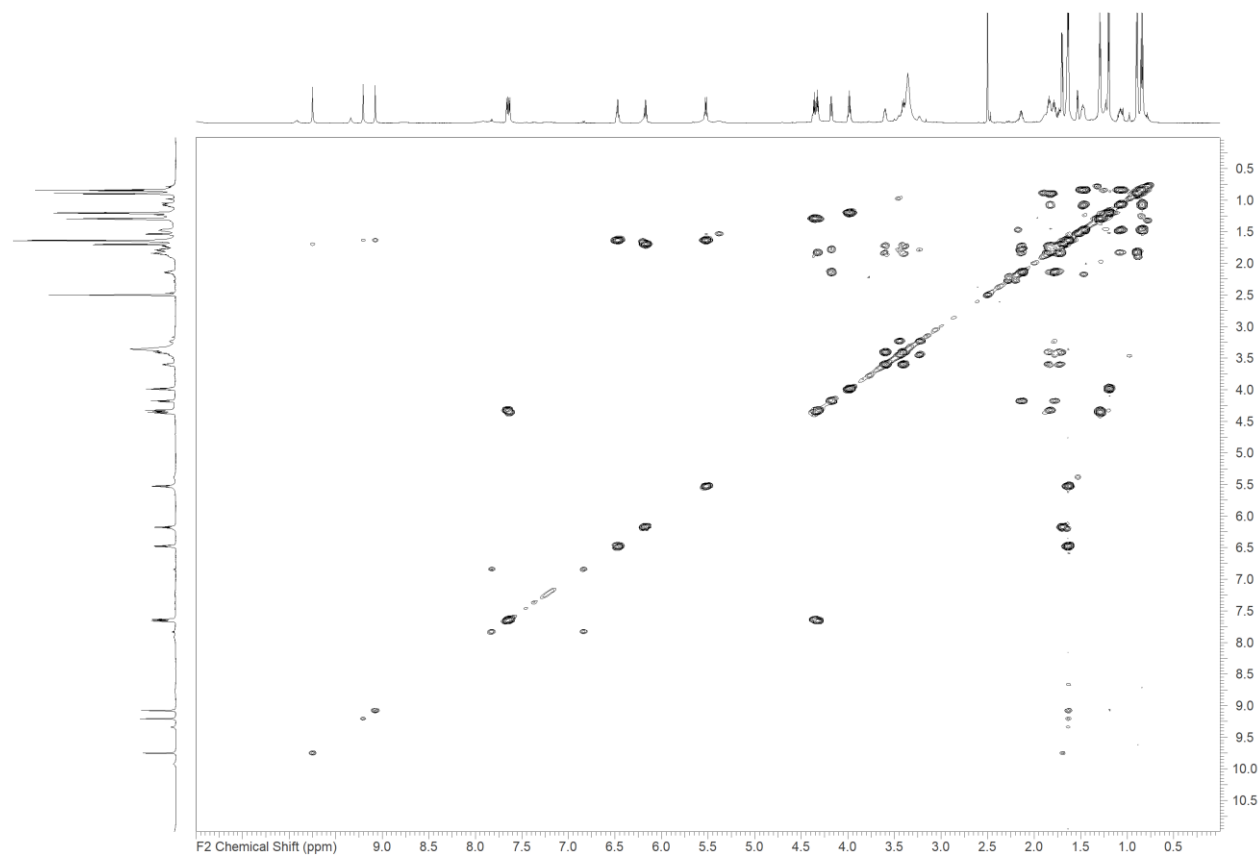

**Figure S5.**  $^1\text{H}$ - $^1\text{H}$ -Cosy spectrum of scabimycin A (DMSO- $d_6$ , 700 MHz).

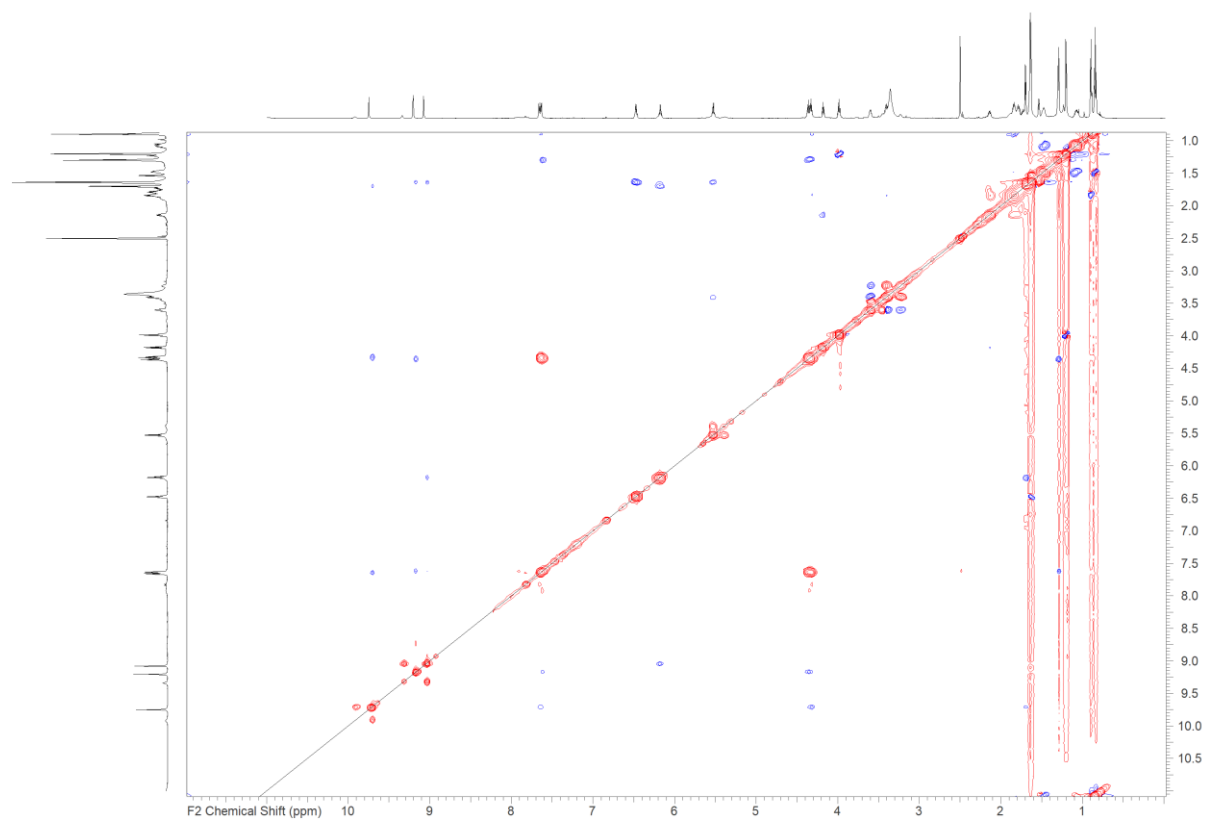

**Figure S6.** ROESY spectrum of scabimycin A (DMSO- $d_6$ , 700 MHz).

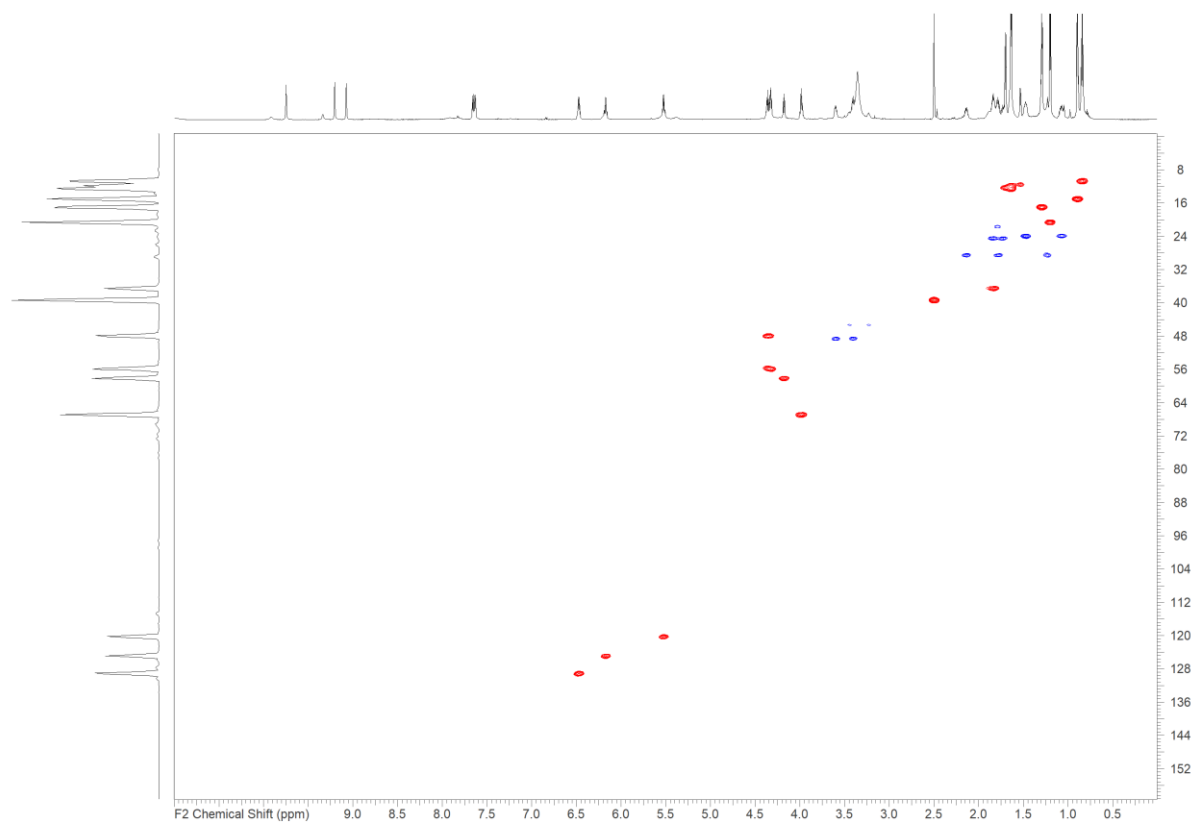

**Figure S7.** HSQC spectrum of scabimycin A (DMSO- $d_6$ , 700 MHz).

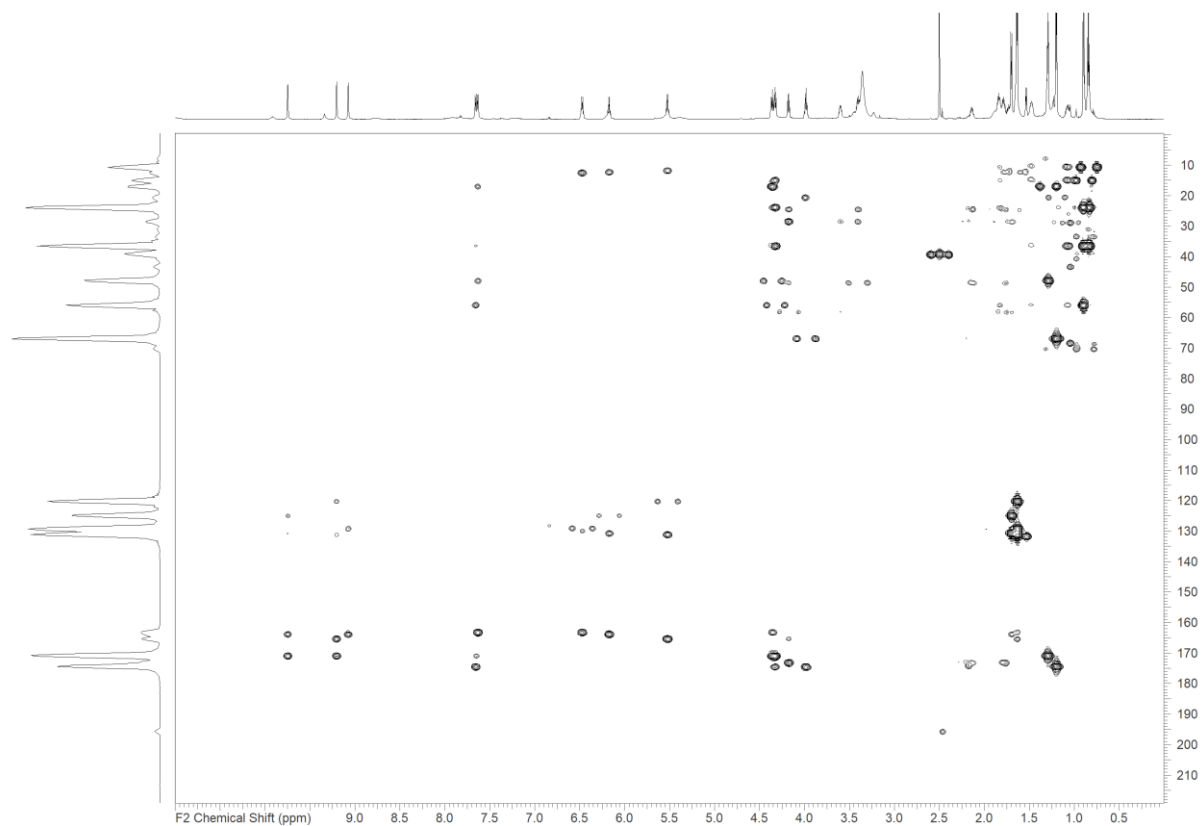

**Figure 8.** HMBC spectrum of scabimycin A (DMSO- $d_6$ , 700 MHz).

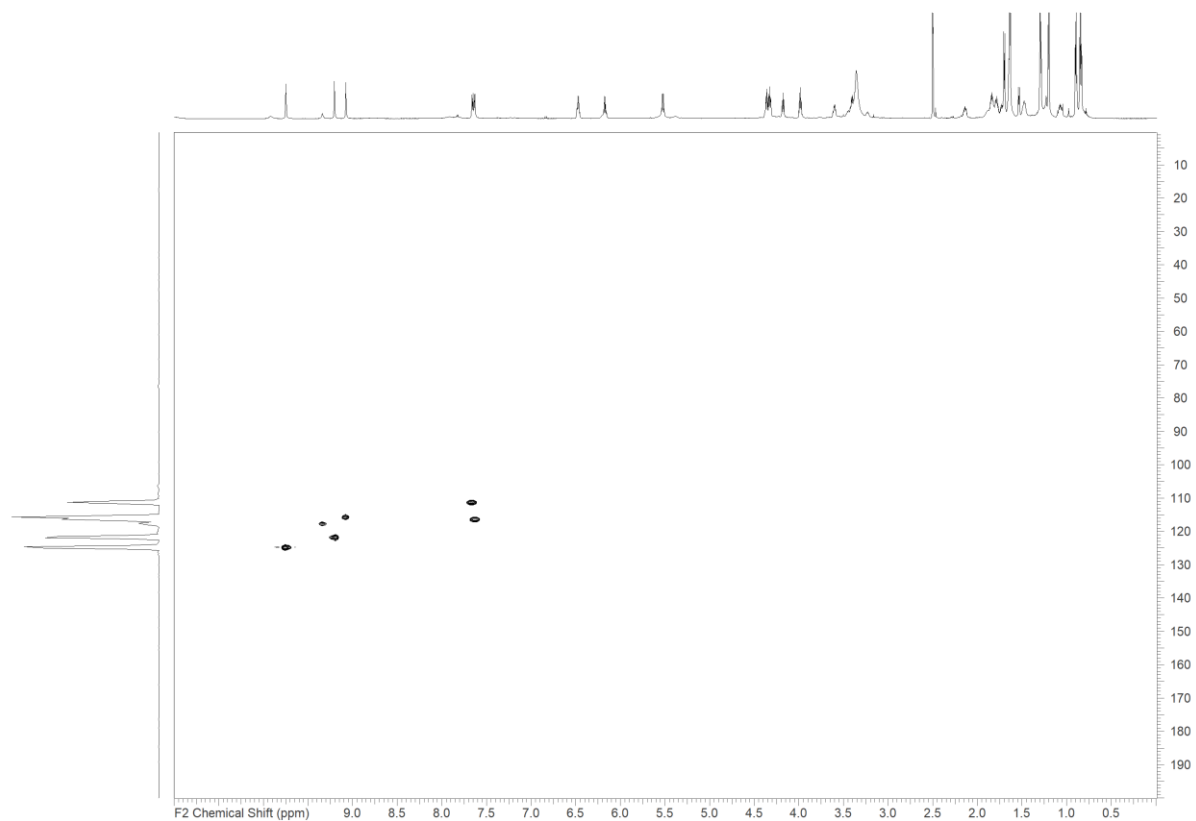

**Figure S9.** <sup>15</sup>N-HSQC spectrum of scabimycin A (DMSO- $d_6$ , 700 MHz).

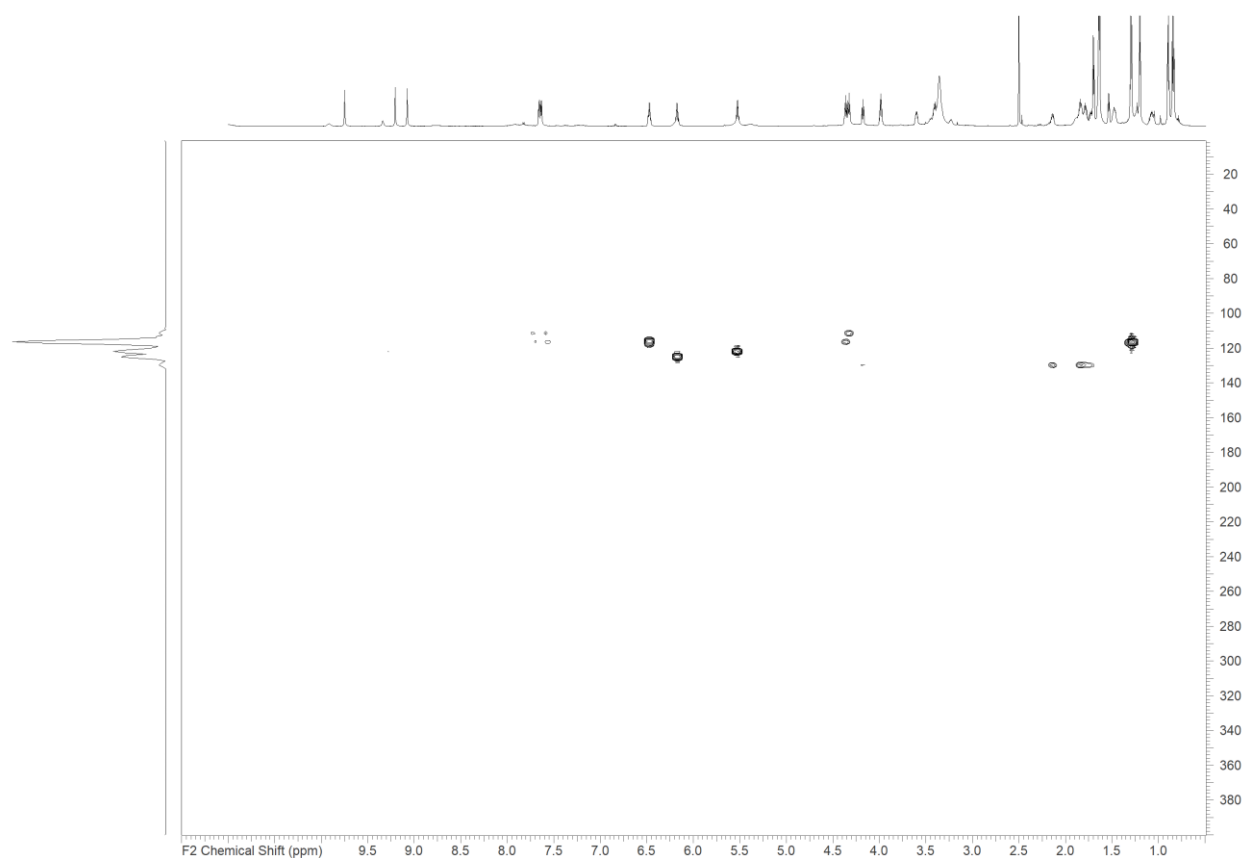

**Figure S10.**  $^{15}\text{N}$ -HMBC spectrum of scabimycin A (DMSO- $d_6$ , 700 MHz).

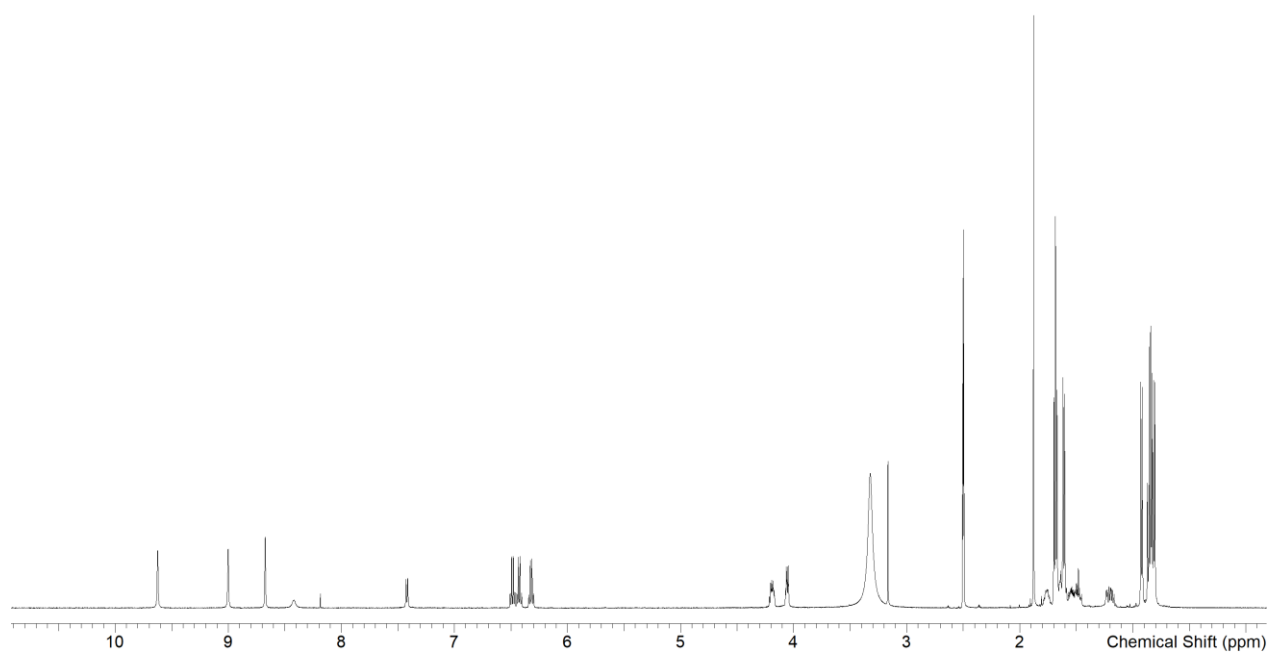

**Figure S11.**  $^1\text{H}$  NMR spectrum of scabimycin B (DMSO- $d_6$ , 700 MHz).



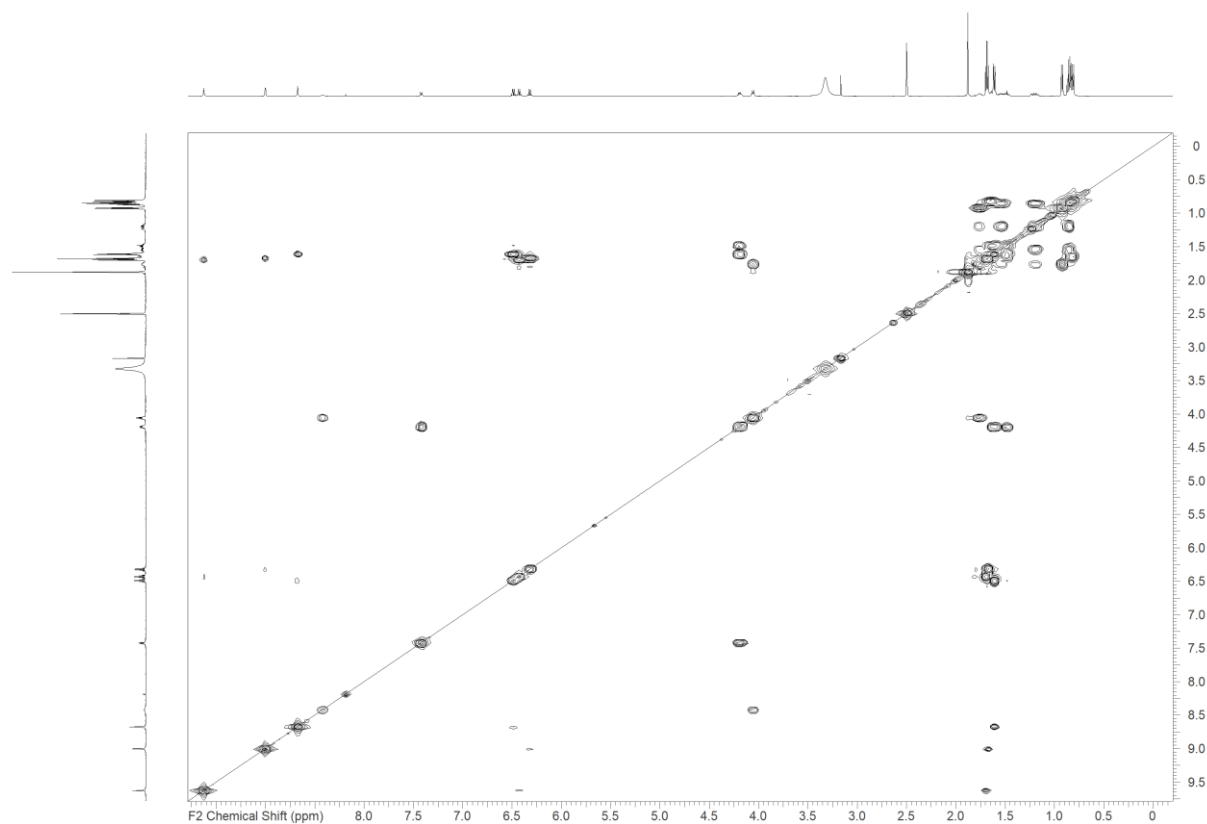

**Figure S12.**  $^1\text{H}$ - $^1\text{H}$ -Cosy spectrum of scabimycin B (DMSO- $d_6$ , 700 MHz).

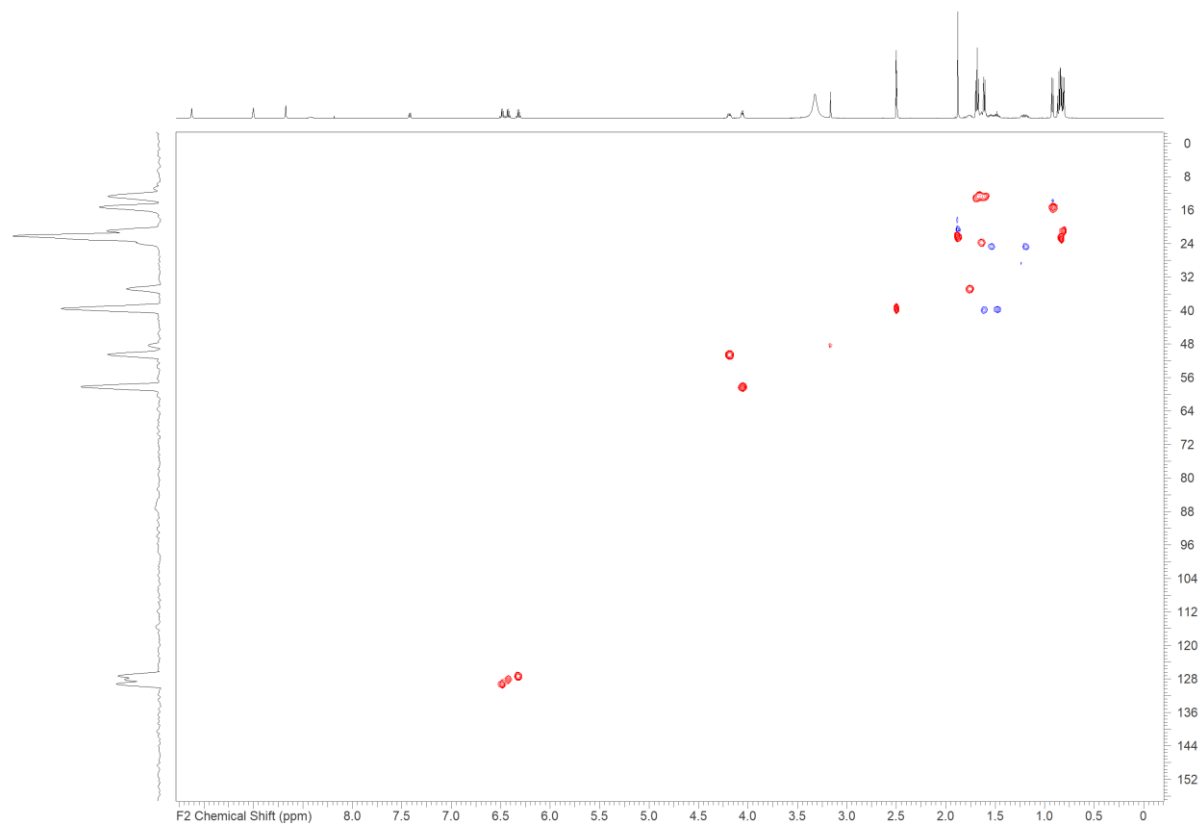

**Figure S13.** HSQC spectrum of scabimycin B (DMSO- $d_6$ , 700 MHz).

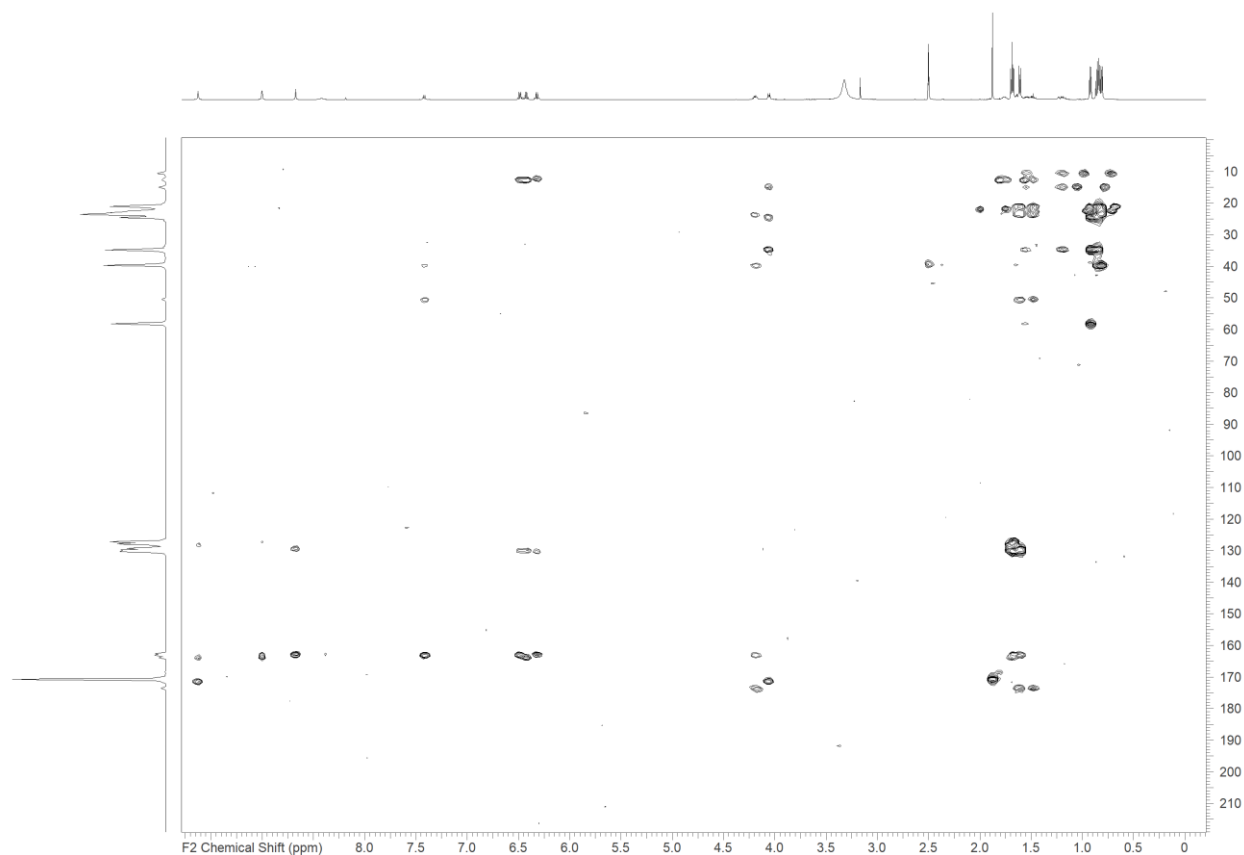

**Figure S14.** HMBC spectrum of scabimycin B (DMSO- $d_6$ , 700 MHz).

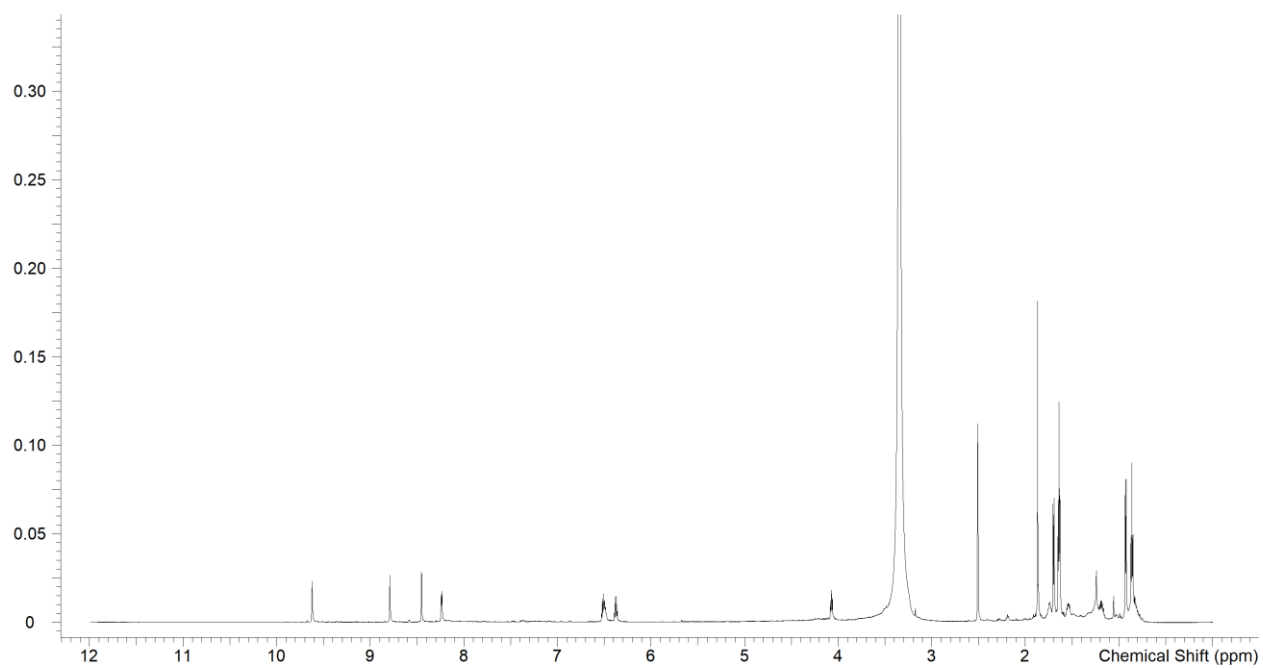

**Figure S15.**  $^1\text{H}$  NMR spectrum of scabimycin C (DMSO- $d_6$ , 700 MHz).

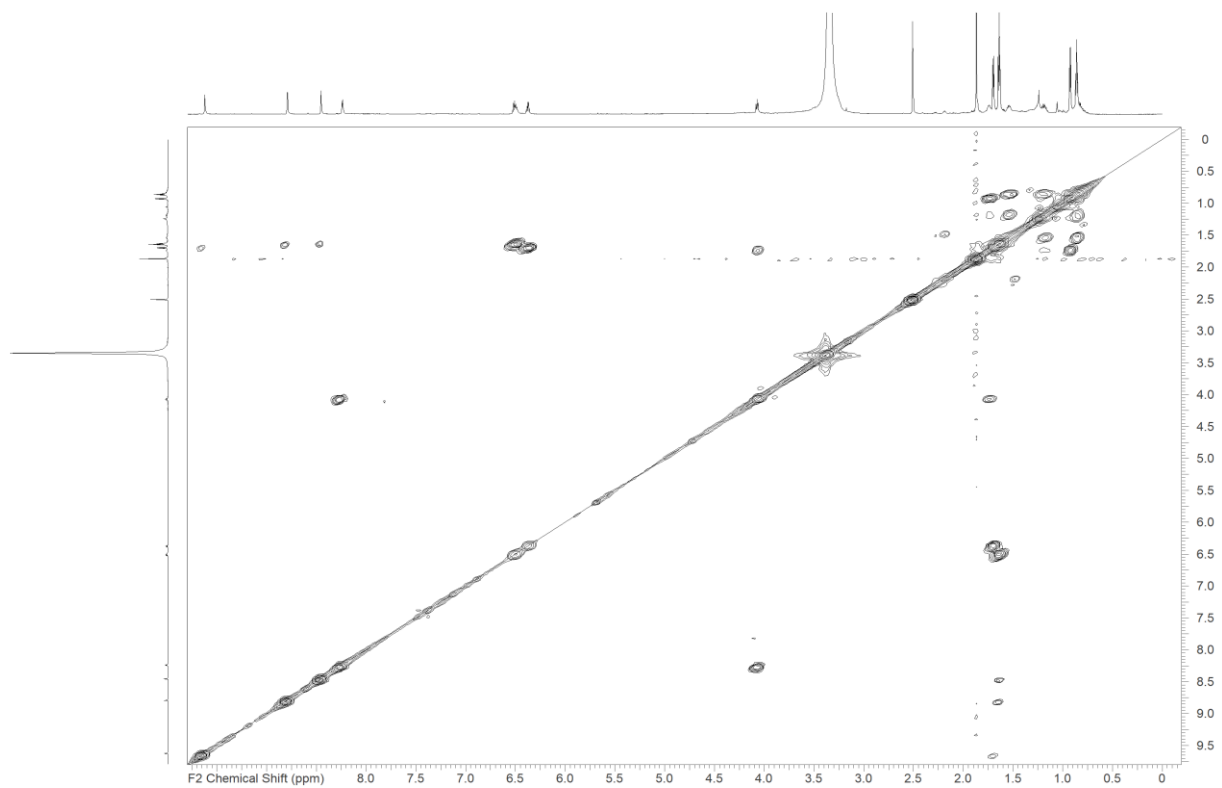

**Figure S162.**  $^1\text{H}$ - $^1\text{H}$ -Cosy spectrum of scabimycin C (DMSO- $\text{d}_6$ , 700 MHz).

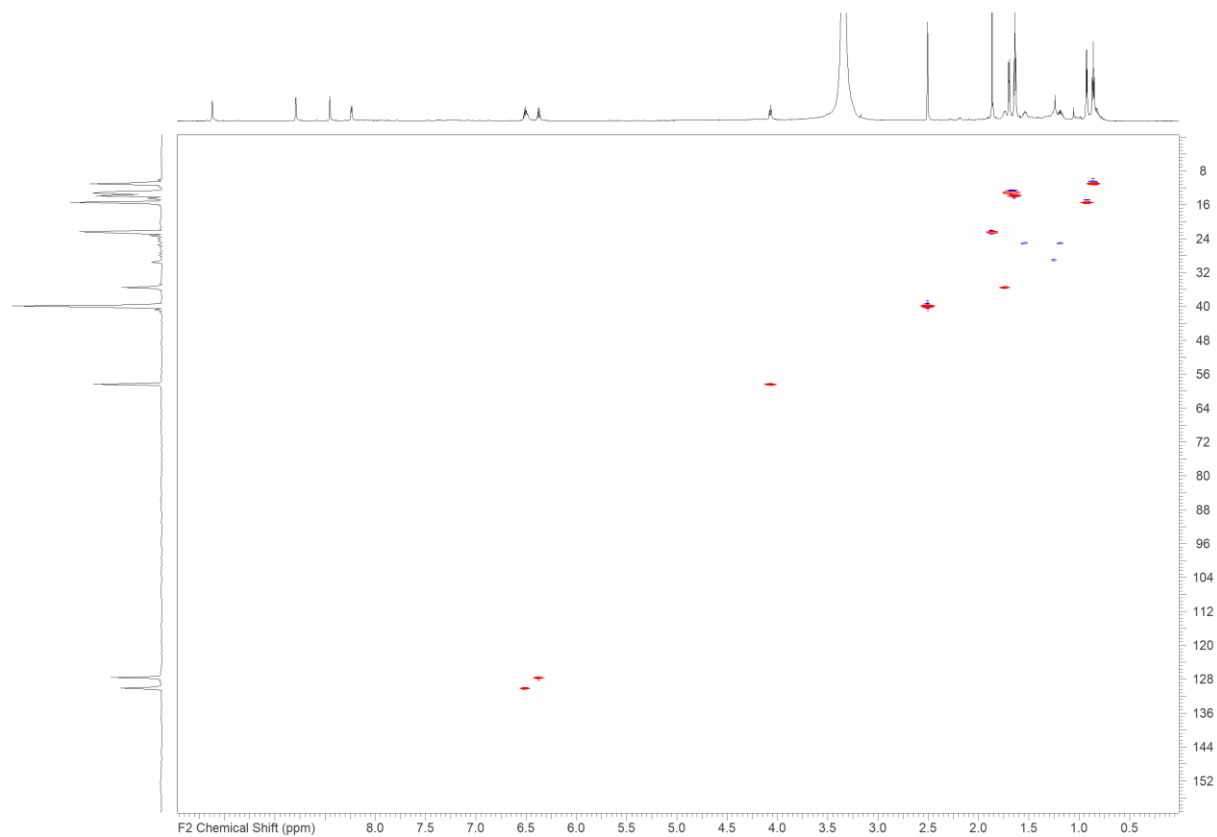

**Figure S17.** HSQC spectrum of scabimycin B (DMSO- $\text{d}_6$ , 700 MHz).

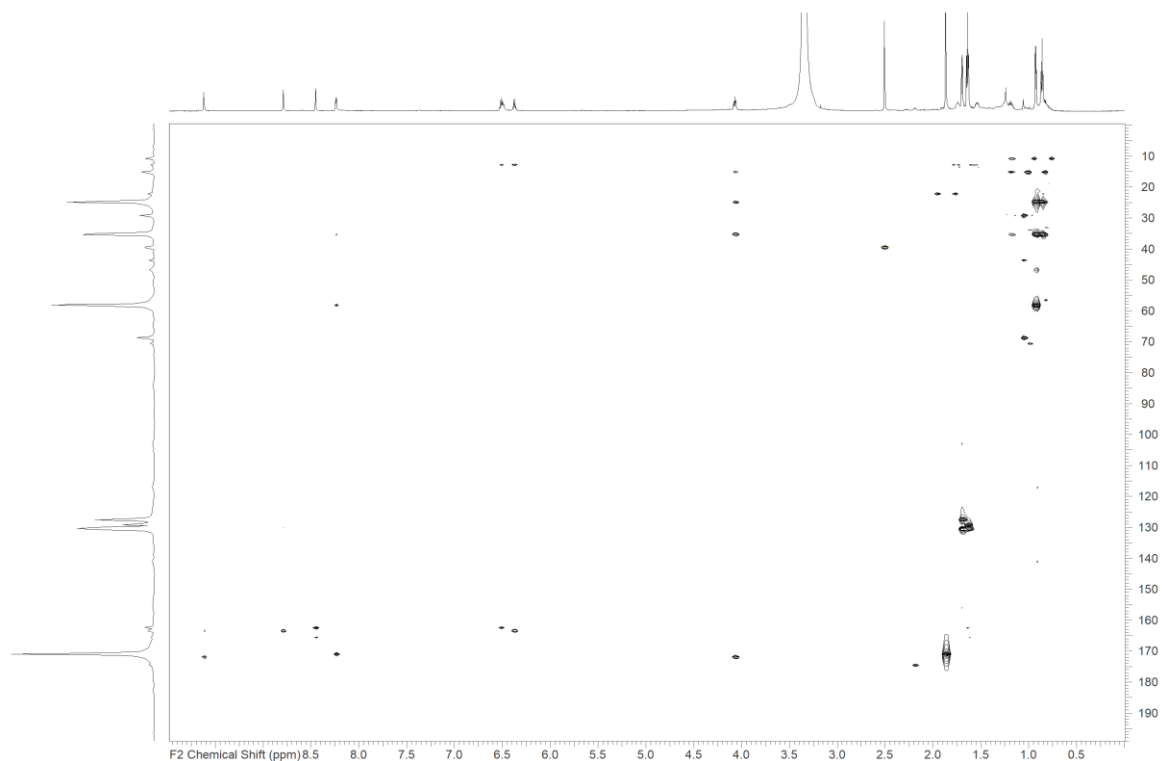

**Figure S18.** HMBC spectrum of scabimycin C (DMSO- $d_6$ , 700 MHz).

### Marfey's Method

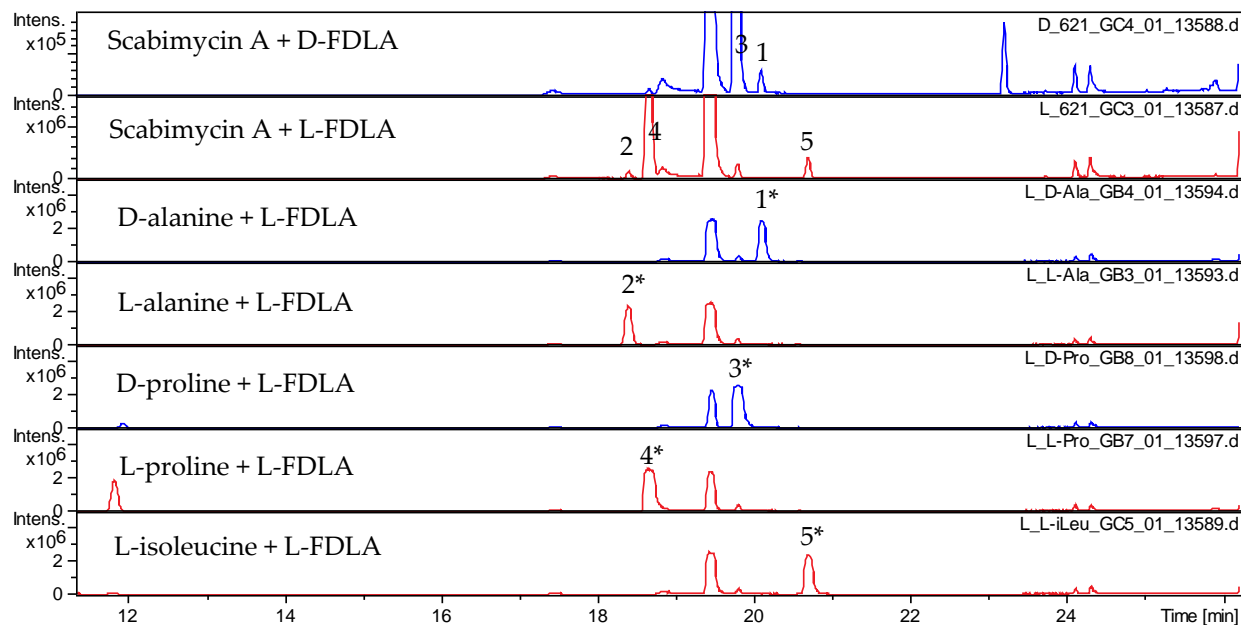

**Figure S19.** Extract of LC-HRMS chromatogram (retention time 17 to 28 min) of hydrolyzed scabimycin A derivatized with D-FDLA and L-FDLA showing single amino acids D/L-alanine (1/2), D/L-proline (3/4) and isoleucine (5) and leucine (1/3). To compare the amino acids present in our probe, pure D/L-amino acids derivatized with L-FDLA (D/L-alanine (1\*/2\*), D/L-proline (3\*/4\*) and L-isoleucine (5\*)) are shown below. Comparison with the standard amino acids and the fact that D-FDLA derivatized amino acids elute later, lead us to the assumption that in all cases the amino acids

possess L-configuration. It needs to be mentioned that from this test, it is not possible to decide whether L-allo-isoleucine or L-isoleucine is present. The intensive peak at RT 19.5 coincides with the mass of the underivatized FLDA.

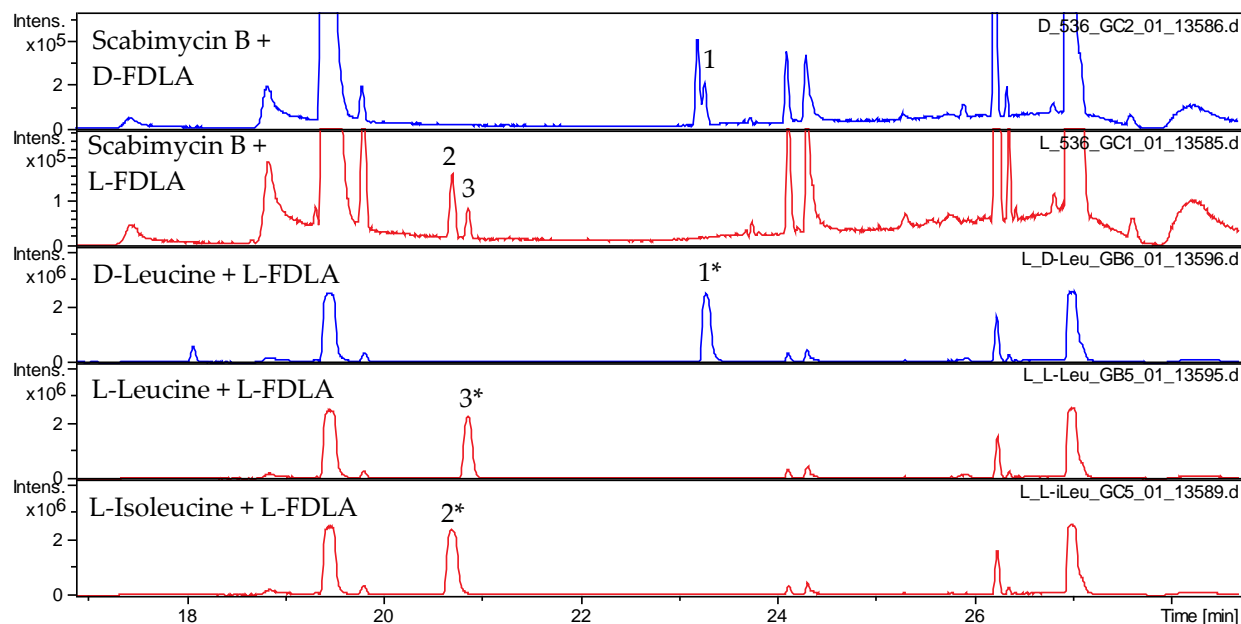

**Figure S20.** Extract of LC-HRMS chromatogram (retention time 17 to 28 min) of hydrolyzed scabimycin B derivatized with D-FDLA and L-FDLA showing single amino acids isoleucine (2) and leucine (1/3). To compare the amino acids present in our probe, pure D/L-amino acids derivatized with L-FDLA (D-Leucine (1\*), L-Leucine (3\*) and L-isoleucine (2\*)) are shown below. Comparison with the standard amino acids and the fact that D-FDLA derivatized amino acids elute later, lead us to the assumption that both in both cases the amino acids have L-configuration. It needs to be mentioned that from this test, it is not possible to decide whether L-allo-isoleucine or L-isoleucine is present. The intensive peak at RT 19.5 coincides with the mass of the underivatized FLDA.

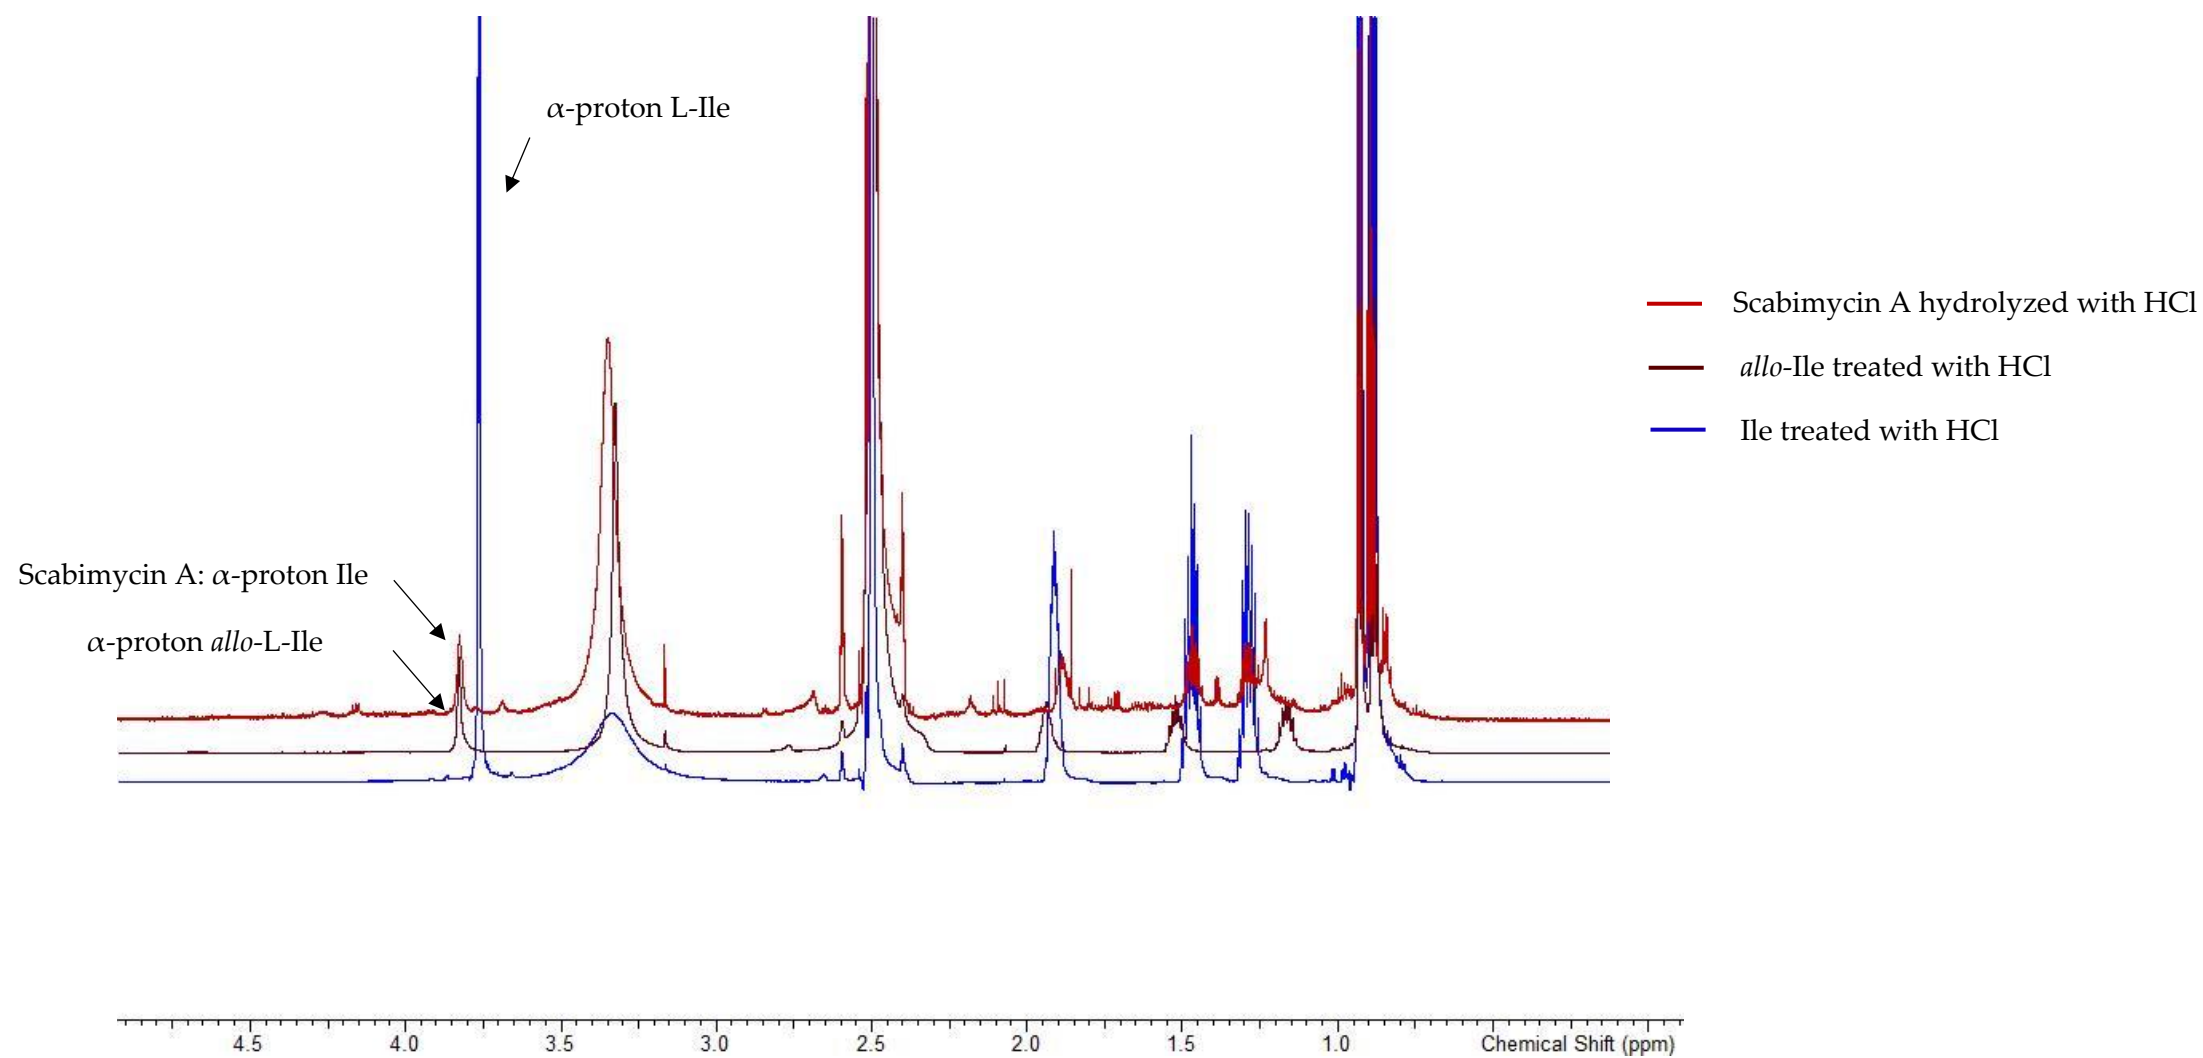

**Figure S21.** Determination of *allo*-isoleucine in scabimycin A. Scabimycin A, *allo*-L-Ile and L-Ile were treated with HCl at 110 °C. <sup>1</sup>H-NMR were acquired in DMSO-*d*<sub>6</sub> and compared. The chemical shifts of  $\alpha$ -proton of scabimycin A and *allo*-L-Ile coincide while  $\alpha$ -proton of L-Ile is shifted up-field.

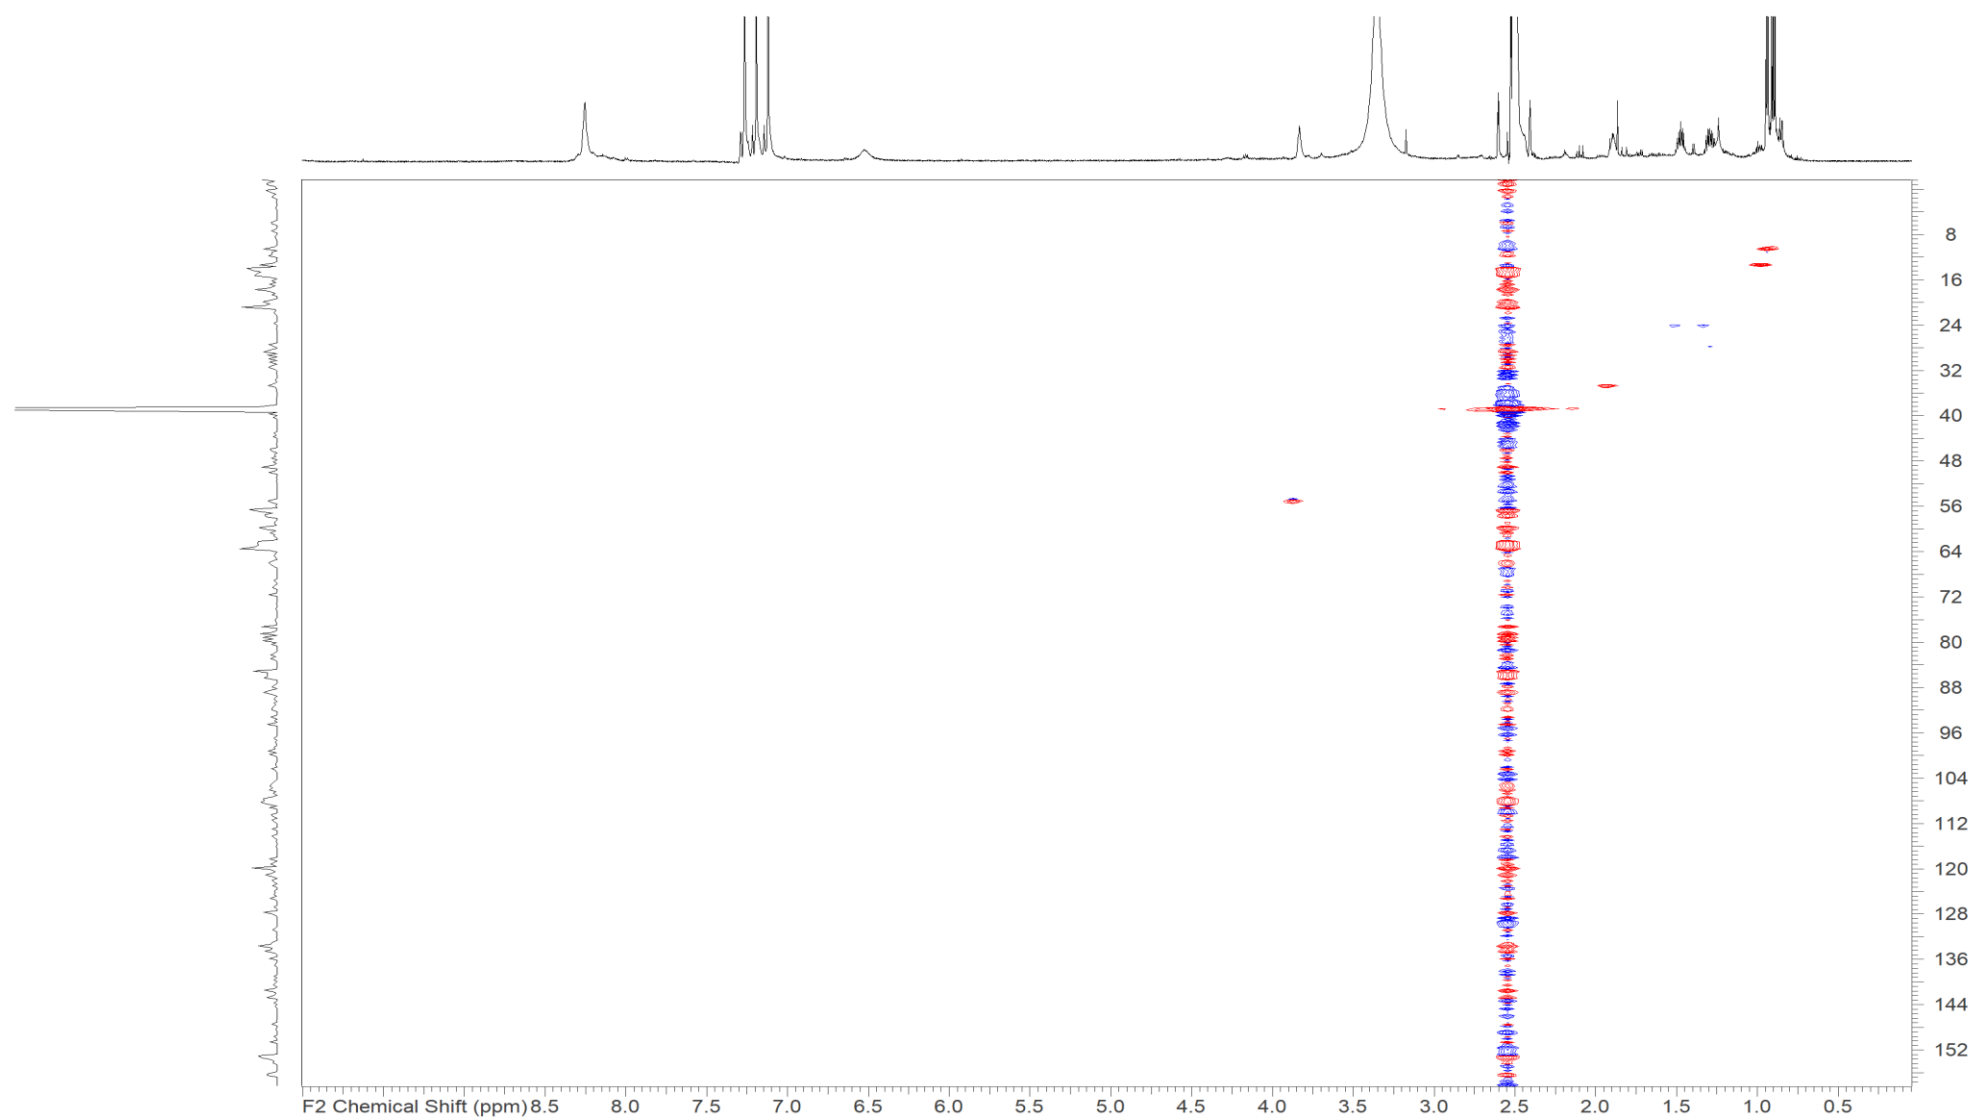

**Figure S22.** HSQC of scabimycin A after treatment with HCl to support the findings for allo-isoleucine.  $^{13}\text{C}$  chemical shift for  $\alpha$ -carbon was found to be around 55 ppm as expected for isoleucine.

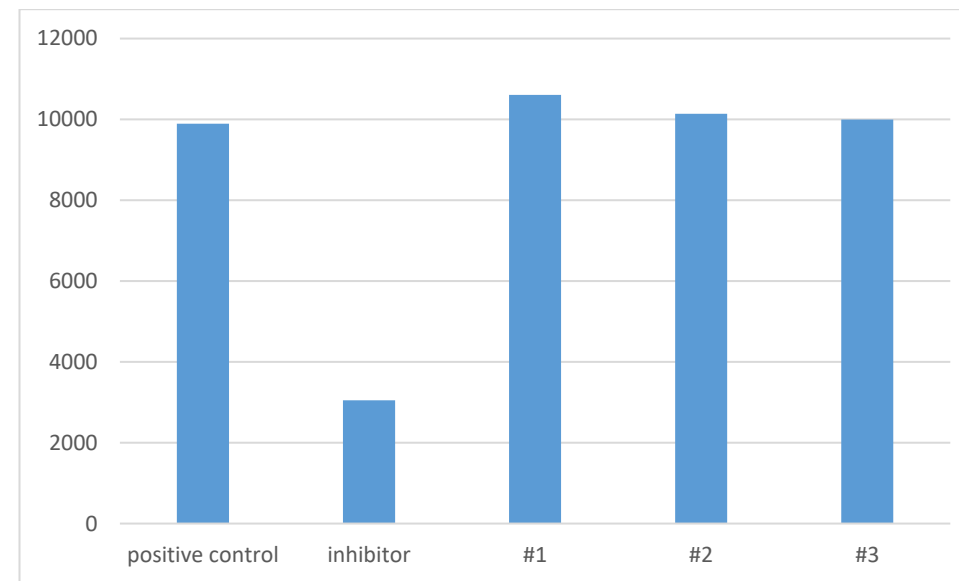

**Figure S23.** Inhibition of 3CL protease by scabimycin A. Positive control – activity of protease without inhibitor, Inhibitor – activity of protease after treatment with specific inhibitor, #1, #2 and #3 – activity of protease inhibited by scabimycin A dilutions #1, #2 and #3.
